# Supplementary material for: Size matters but hunger prevails—begging and provisioning rules in blue tit families
Source: PeerJ. 2018 Jul 19;6:e5301. doi: 10.7717/peerj.5301 (PMC6054862; doi:10.7717/peerj.5301)
Supplement: Supplemental Information 1 — Heathers are explained in the tab ‘Explanation’. The raw measurements can be found in the tab ‘Begging and feeding data’. [file peerj-06-5301-s001.xlsx]

## Sheet: Explanation
Begging and feeding data
RankID	Unique identification number of the heaviest (H) or lightest (L) two nestlings within the nest
NestID	Nest identification number
FeedingNr	Feeding sequence 1 or 2
Weight	Heaviest (H) or lightest (L) two nestlings within the nest
Context	Control / Food Deprived (FD) nestlings / Sibling of the FD nestlings
BroodSize	Number of nestlings within the brood
BeggingRaw	Begging duration (seconds), summed for both nestlings within the weight rank
BeggingZ	Z-score of the 'BeggingRaw' values
Fed	1 if one of both nestlings per mass rank received a food item, 0 if not

## Sheet: Begging and feeding data
RankID	NestID	FeedingNr	Weight	Context	BroodSize	BeggingRaw	BeggingZ	Fed
16L	16	1	L	Control	12	6.72	1.24539	0
16H	16	1	H	Control	12	0	-1.42344	0
16L	16	2	L	Control	12	6.52	1.21112	1
16H	16	2	H	Control	12	0	-1.42344	0
16L	16	1	L	FD	12	8.68	1.54083	1
16H	16	1	H	Sibling	12	4.975	0.910804	0
16L	16	2	L	FD	12	2.52	0.219871	0
16H	16	2	H	Sibling	12	2.17	0.083114	0
20L	20	1	L	Control	11	0	-1.42344	0
20H	20	1	H	Control	11	0.77	-0.677849	1
20L	20	2	L	Control	11	1.97	-0.00198511	0
20H	20	2	H	Control	11	0	-1.42344	0
20L	20	1	L	FD	11	6.34	1.17948	0
20H	20	1	H	Sibling	11	6.17	1.14888	0
20L	20	2	L	FD	11	2.77	0.309467	0
20H	20	2	H	Sibling	11	3.27	0.472091	0
25L	25	1	L	Control	9	0	-1.42344	0
25H	25	1	H	Control	9	0	-1.42344	0
25L	25	2	L	Control	9	11.9	1.91581	0
25H	25	2	H	Control	9	5.485	1.01776	0
25L	25	1	L	Sibling	9	16.245	2.29488	1
25H	25	1	H	FD	9	5.825	1.08449	0
25L	25	2	L	Sibling	9	9.44	1.63952	0
25H	25	2	H	FD	9	21.15	2.62174	1
28L	28	1	L	Control	11	3.33	0.490312	0
28H	28	1	H	Control	11	3.38	0.505304	0
28L	28	2	L	Control	11	3.5	0.540599	0
28H	28	2	H	Control	11	2.665	0.272583	0
28L	28	1	L	Sibling	11	1.45	-0.253319	0
28H	28	1	H	FD	11	1.38	-0.291171	1
28L	28	2	L	Sibling	11	1.265	-0.355843	0
28H	28	2	H	FD	11	1.97	-0.00198511	1
33L	33	1	L	Control	11	2.77	0.309467	0
33H	33	1	H	Control	11	0	-1.42344	0
33L	33	2	L	Control	11	5.31	0.982038	0
33H	33	2	H	Control	11	0	-1.42344	0
33L	33	1	L	Sibling	11	1.735	-0.109624	1
33H	33	1	H	FD	11	0	-1.42344	0
33L	33	2	L	Sibling	11	3.64	0.580605	0
33H	33	2	H	FD	11	0	-1.42344	0
40L	40	1	L	Control	14	0	-1.42344	0
40H	40	1	H	Control	14	0	-1.42344	0
40L	40	2	L	Control	14	5.715	1.06327	0
40H	40	2	H	Control	14	0	-1.42344	0
40L	40	1	L	Sibling	14	0	-1.42344	0
40H	40	1	H	FD	14	1.28	-0.347223	1
40L	40	2	L	Sibling	14	0	-1.42344	0
40H	40	2	H	FD	14	1.365	-0.299427	1
42L	42	1	L	Control	12	2.935	0.365403	0
42H	42	1	H	Control	12	3	0.386796	0
42L	42	2	L	Control	12	7.9	1.43113	1
42H	42	2	H	Control	12	0	-1.42344	0
42L	42	1	L	FD	12	5.07	0.931402	1
42H	42	1	H	Sibling	12	0	-1.42344	0
42L	42	2	L	FD	12	8.94	1.57544	1
42H	42	2	H	Sibling	12	8.91	1.57149	0
45L	45	1	L	Control	11	0	-1.42344	0
45H	45	1	H	Control	11	0	-1.42344	0
45L	45	2	L	Control	11	7.84	1.42229	0
45H	45	2	H	Control	11	0	-1.42344	0
45L	45	1	L	FD	11	7.94	1.43698	1
45H	45	1	H	Sibling	11	4.585	0.822662	0
45L	45	2	L	FD	11	15.4	2.22928	1
45H	45	2	H	Sibling	11	19.3	2.50786	0
51L	51	1	L	Control	9	0	-1.42344	0
51H	51	1	H	Control	9	5.57	1.03476	0
51L	51	2	L	Control	9	8.83	1.56091	0
51H	51	2	H	Control	9	0.2	-1.18536	0
51L	51	1	L	FD	9	3.335	0.491819	1
51H	51	1	H	Sibling	9	3.4	0.511253	0
51L	51	2	L	FD	9	3.5	0.540599	0
51H	51	2	H	Sibling	9	2.34	0.151328	1
54L	54	1	L	Control	13	0	-1.42344	0
54H	54	1	H	Control	13	0	-1.42344	0
54L	54	2	L	Control	13	0	-1.42344	0
54H	54	2	H	Control	13	0	-1.42344	0
54L	54	1	L	FD	13	2.485	0.206822	1
54H	54	1	H	Sibling	13	0	-1.42344	0
54L	54	2	L	FD	13	3.75	0.6112	1
54H	54	2	H	Sibling	13	0	-1.42344	0
61L	61	1	L	Control	12	6.6	1.22493	0
61H	61	1	H	Control	12	1.53	-0.211362	0
61L	61	2	L	Control	12	1.95	-0.0108082	1
61H	61	2	H	Control	12	2.2	0.0954137	0
61L	61	1	L	FD	12	0.43	-0.956384	0
61H	61	1	H	Sibling	12	3.1	0.41904	0
61L	61	2	L	FD	12	1.94	-0.0152422	0
61H	61	2	H	Sibling	12	0	-1.42344	0
64L	64	1	L	Control	9	5.565	1.03377	0
64H	64	1	H	Control	9	5.6	1.04071	0
64L	64	2	L	Control	9	1.4	-0.280244	0
64H	64	2	H	Control	9	1.28	-0.347223	0
64L	64	1	L	Sibling	9	5.07	0.931402	0
64H	64	1	H	FD	9	4.7	0.849277	0
64L	64	2	L	Sibling	9	1.5	-0.226938	0
64H	64	2	H	FD	9	1.94	-0.0152422	1
68L	68	1	L	FD	8	12.45	1.97033	1
68H	68	1	H	Sibling	8	5.35	0.99029	0
68L	68	2	L	FD	8	2.415	0.180326	1
68H	68	2	H	Sibling	8	2.33	0.147413	0
74L	74	1	L	Control	11	2.97	0.376966	0
74H	74	1	H	Control	11	2.615	0.254645	1
74L	74	2	L	Control	11	1.97	-0.00198511	0
74H	74	2	H	Control	11	1.83	-0.0650364	0
74L	74	1	L	Sibling	11	3.27	0.472091	0
74H	74	1	H	FD	11	3.3	0.481233	1
74L	74	2	L	Sibling	11	1.785	-0.085967	0
74H	74	2	H	FD	11	1.77	-0.0930191	0
77L	77	1	L	FD	10	3.635	0.579197	1
77H	77	1	H	Sibling	10	0	-1.42344	0
77L	77	2	L	FD	10	4.5	0.802636	1
77H	77	2	H	Sibling	10	0	-1.42344	0
78L	78	1	L	Control	12	1.43	-0.264023	0
78H	78	1	H	Control	12	1.43	-0.264023	1
78L	78	2	L	Control	12	5.34	0.988231	0
78H	78	2	H	Control	12	5.34	0.988231	1
78L	78	1	L	FD	12	4.17	0.721839	1
78H	78	1	H	Sibling	12	4.17	0.721839	0
78L	78	2	L	FD	12	0.4	-0.98407	1
78H	78	2	H	Sibling	12	0.785	-0.666829	0
80L	80	1	L	FD	11	11.72	1.89746	0
80H	80	1	H	Sibling	11	1.18	-0.40579	0
80L	80	2	L	FD	11	8.58	1.52727	1
80H	80	2	H	Sibling	11	8.46	1.51081	0
81L	81	1	L	Control	9	4.67	0.842386	1
81H	81	1	H	Control	9	1.67	-0.141032	0
81L	81	2	L	Control	9	3.05	0.403018	0
81H	81	2	H	Control	9	1.8	-0.0789528	0
83L	83	1	L	Control	12	3.53	0.549275	1
83H	83	1	H	Control	12	0	-1.42344	0
83L	83	2	L	Control	12	0	-1.42344	0
83H	83	2	H	Control	12	0.67	-0.753789	0
83L	83	1	L	Sibling	12	2.15	0.0748493	1
83H	83	1	H	FD	12	1.685	-0.133717	0
83L	83	2	L	Sibling	12	1.2	-0.393864	1
83H	83	2	H	FD	12	1.1	-0.45461	0
84L	84	1	L	Control	12	2.53	0.223575	0
84H	84	1	H	Control	12	2.07	0.0412575	0
84L	84	2	L	Control	12	0	-1.42344	0
84H	84	2	H	Control	12	0	-1.42344	0
84L	84	1	L	Sibling	12	0	-1.42344	0
84H	84	1	H	FD	12	2.05	0.0327228	1
84L	84	2	L	Sibling	12	0.73	-0.707697	0
84H	84	2	H	FD	12	1.75	-0.102481	1
88L	88	1	L	FD	12	6.975	1.28783	0
88H	88	1	H	Sibling	12	5.705	1.06132	0
88L	88	2	L	FD	12	1.92	-0.0241556	1
88H	88	2	H	Sibling	12	1.15	-0.423884	0
91L	91	1	L	Control	9	0	-1.42344	0
91H	91	1	H	Control	9	1.7	-0.126442	0
91L	91	2	L	Control	9	0	-1.42344	0
91H	91	2	H	Control	9	0	-1.42344	0
91L	91	1	L	Sibling	9	1.67	-0.141032	0
91H	91	1	H	FD	9	1.72	-0.116805	1
91L	91	2	L	Sibling	9	1.13	-0.436088	0
91H	91	2	H	FD	9	1.085	-0.463971	1
K109L	K109	1	L	Control	11	0	-1.42344	0
K109H	K109	1	H	Control	11	0	-1.42344	0
K109L	K109	2	L	Control	11	6.43	1.19539	0
K109H	K109	2	H	Control	11	0	-1.42344	0
K109L	K109	1	L	FD	11	5.485	1.01776	0
K109H	K109	1	H	Sibling	11	0	-1.42344	0
K109L	K109	2	L	FD	11	2.485	0.206822	1
K109H	K109	2	H	Sibling	11	1.53	-0.211362	0
K74L	K74	1	L	Sibling	9	6.49	1.2059	0
K74H	K74	1	H	FD	9	7.21	1.32575	1
K74L	K74	2	L	Sibling	9	5.475	1.01574	1
K74H	K74	2	H	FD	9	0	-1.42344	0
K83L	K83	1	L	Control	12	3.07	0.40945	0
K83H	K83	1	H	Control	12	4.6	0.826165	1
K83L	K83	2	L	Control	12	2.8	0.319817	1
K83H	K83	2	H	Control	12	1.57	-0.190878	0
K83L	K83	1	L	Sibling	12	1.1	-0.45461	0
K83H	K83	1	H	FD	12	1.73	-0.112013	1
K83L	K83	2	L	Sibling	12	6.225	1.15886	0
K83H	K83	2	H	FD	12	8.69	1.54218	1
K89L	K89	1	L	Control	8	4.715	0.852709	0
K89H	K89	1	H	Control	8	6	1.11755	1
K89L	K89	2	L	Control	8	2.47	0.201189	0
K89H	K89	2	H	Control	8	0.77	-0.677849	0
K89L	K89	1	L	Sibling	8	6.13	1.14158	0
K89H	K89	1	H	FD	8	7.115	1.31055	1
K89L	K89	2	L	Sibling	8	6.63	1.23008	0
K89H	K89	2	H	FD	8	9.515	1.64887	1
